# Supplementary material
Source: Copernicus journal article supplement (doi:10.5194/ar-4-189-2026)
Supplement: Supplementary file 1 [file ar-4-189-2026-supplement.pdf]

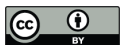

*Supplement of*

**Impact of agricultural interventions on ammonia emissions  
and on PM<sub>2.5</sub> concentrations in the UK: a local and  
regional modelling study**

**Matthieu Pommier et al.**

*Correspondence to:* Matthieu Pommier ([matthieu.pommier@ricardo.com](mailto:matthieu.pommier@ricardo.com))

The copyright of individual parts of the supplement might differ from the article licence.

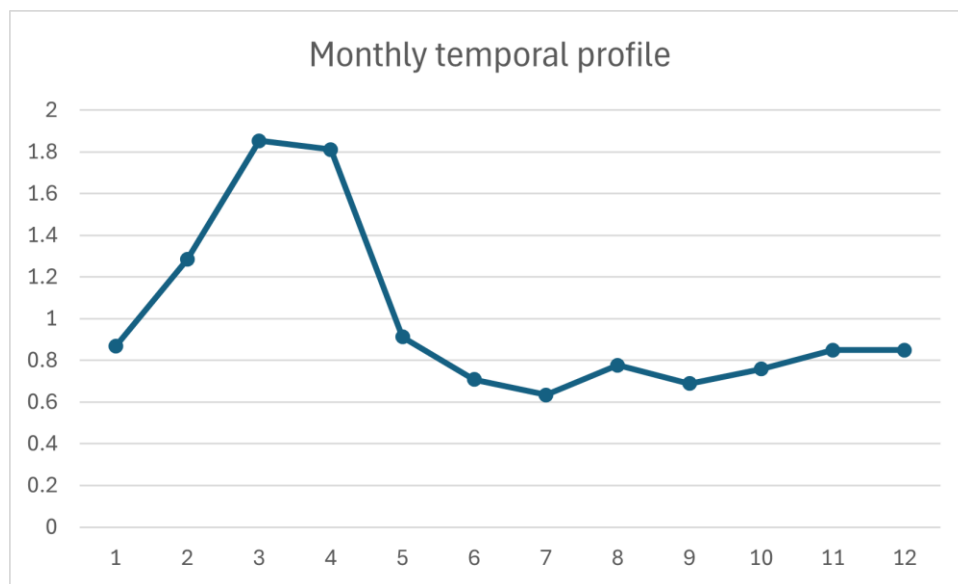

**Figure S1. Monthly temporal profile for NH<sub>3</sub> emissions in agriculture sector in the UK.**

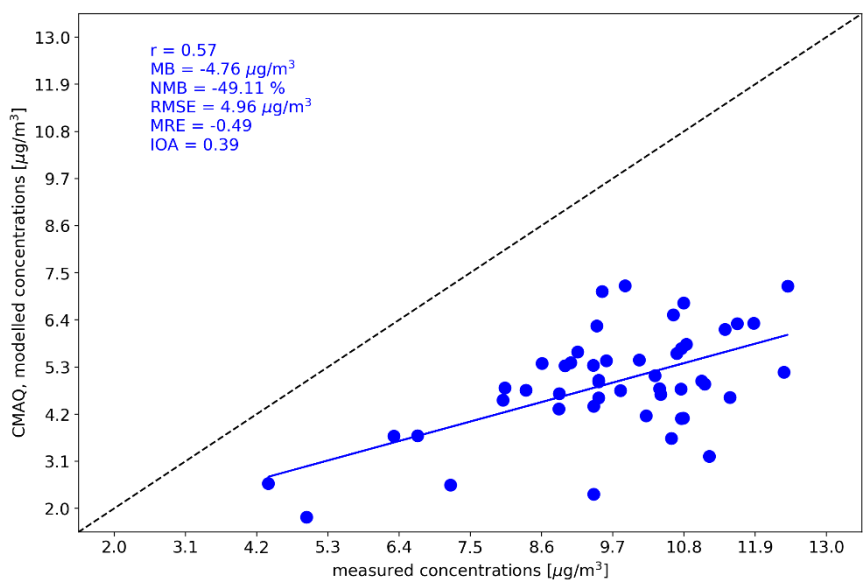

**Figure S2.** Comparison between annual measured concentrations with the modelled values in 2019 using the simulation with UK NH<sub>3</sub> emissions increased by 50%. Only the background stations with a data capture higher than 75% are used. Insert values are the Pearson correlation coefficient (R), the mean bias (MB), the normalized mean bias (NMB), the mean relative error (MRE), the root-mean-square error (RMSE), and the index of agreement (IOA). The blue line represents the linear fit and dashed black line is the 1:1 slope.

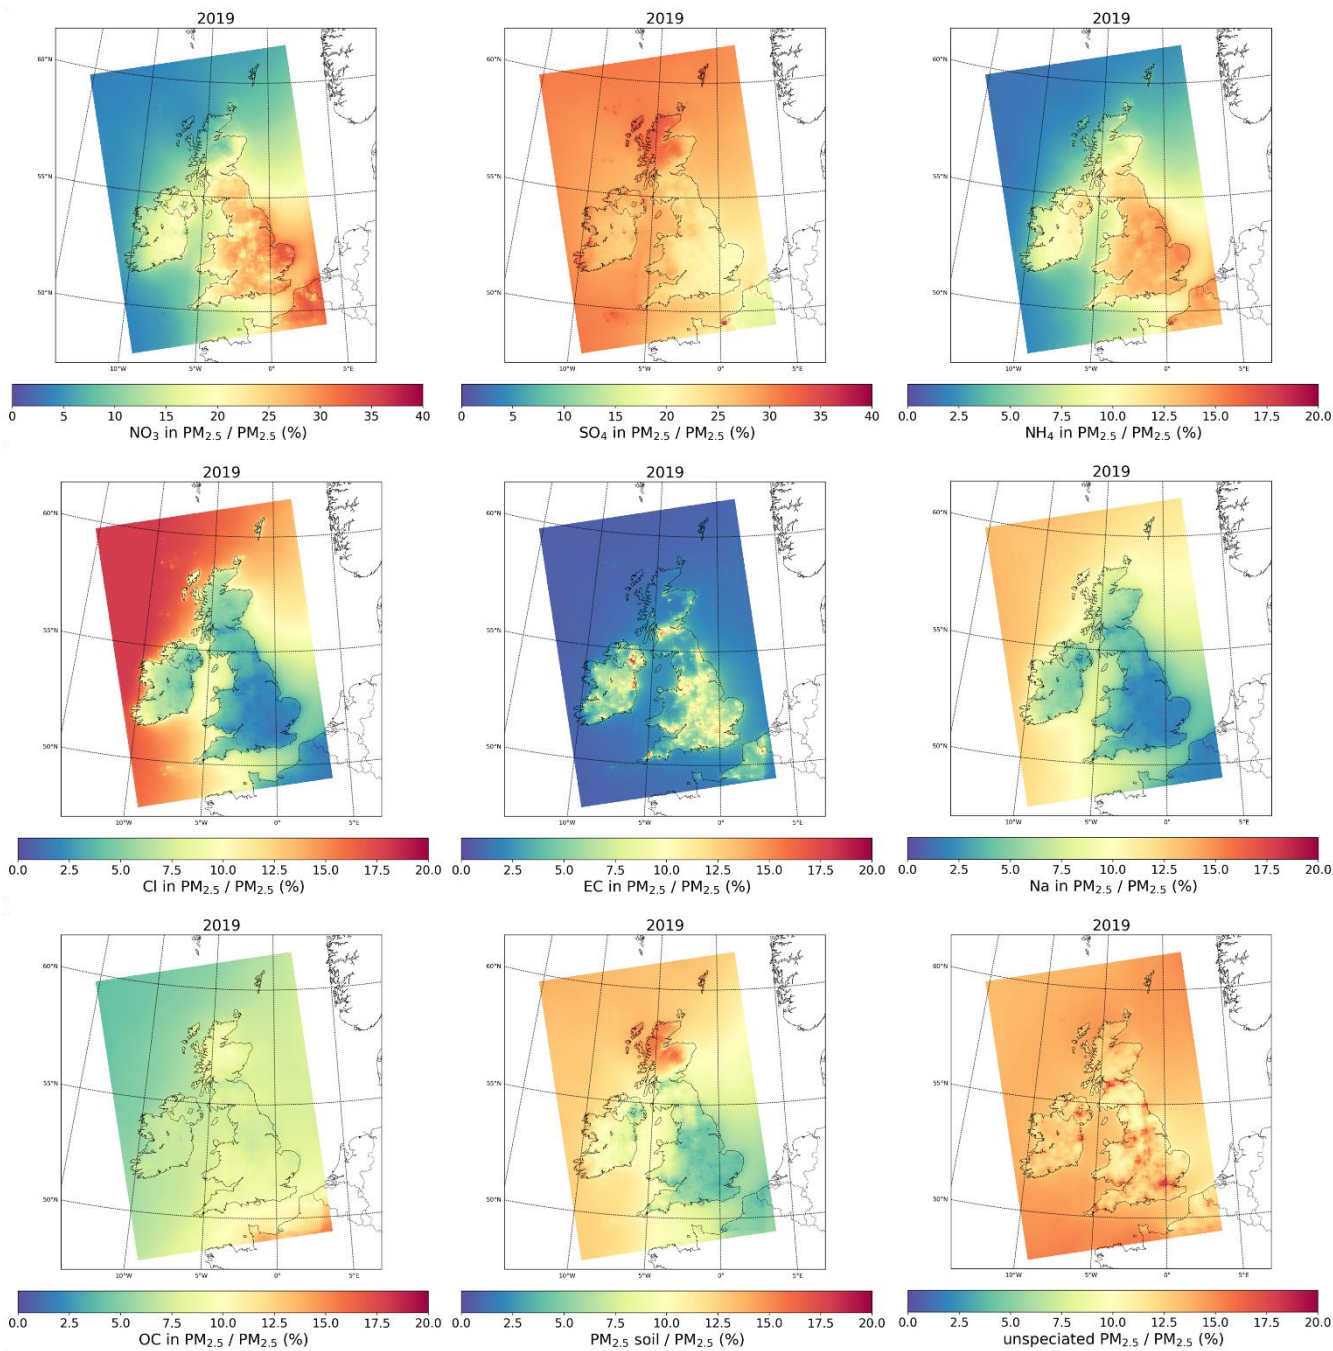

**Figure S3. Composition of PM<sub>2.5</sub> in percent for each component as defined and calculated by CMAQ for the 2019 simulation at 10 km × 10 km spatial resolution. This definition includes NO<sub>3</sub>, SO<sub>4</sub>, NH<sub>4</sub>, Cl, EC, Na, OC soil and unspiciated. Note the different colour scale for NO<sub>3</sub> and SO<sub>4</sub> compared to the other components.**

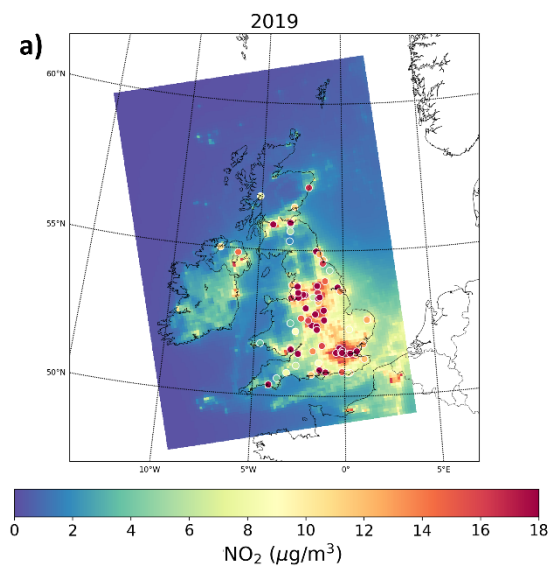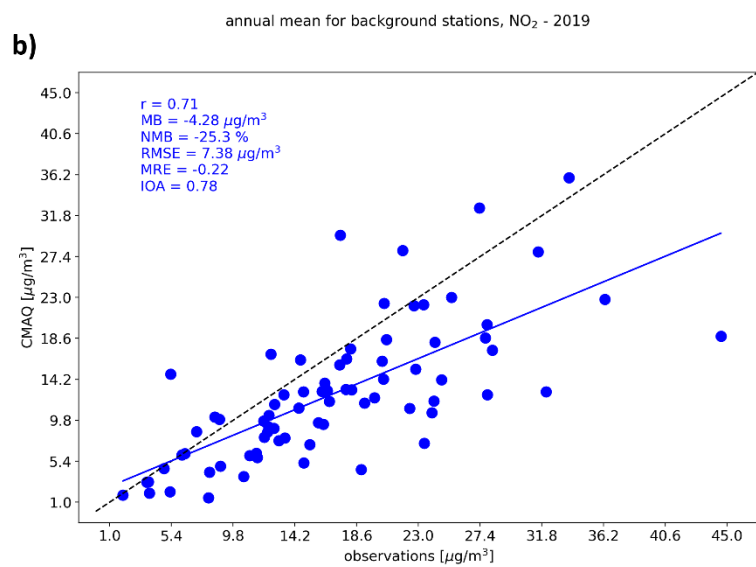

**Figure S4.** Spatial distribution of annual mean NO<sub>2</sub> concentrations in  $\mu\text{g}/\text{m}^3$  calculated by CMAQ at 10 km resolution in 2019. The measured concentrations at the monitoring stations are shown with the coloured circles. b) Comparison between these annual measured concentrations with the modelled values in 2019. Only the background stations with a data capture higher than 75% are used. Insert values are the Pearson correlation coefficient (R), the mean bias (MB), the normalized mean bias (NMB), the mean relative error (MRE), the root-mean-square error (RMSE), and the index of agreement (IOA). The blue line represents the linear fit and dashed black line is the 1:1 slope.

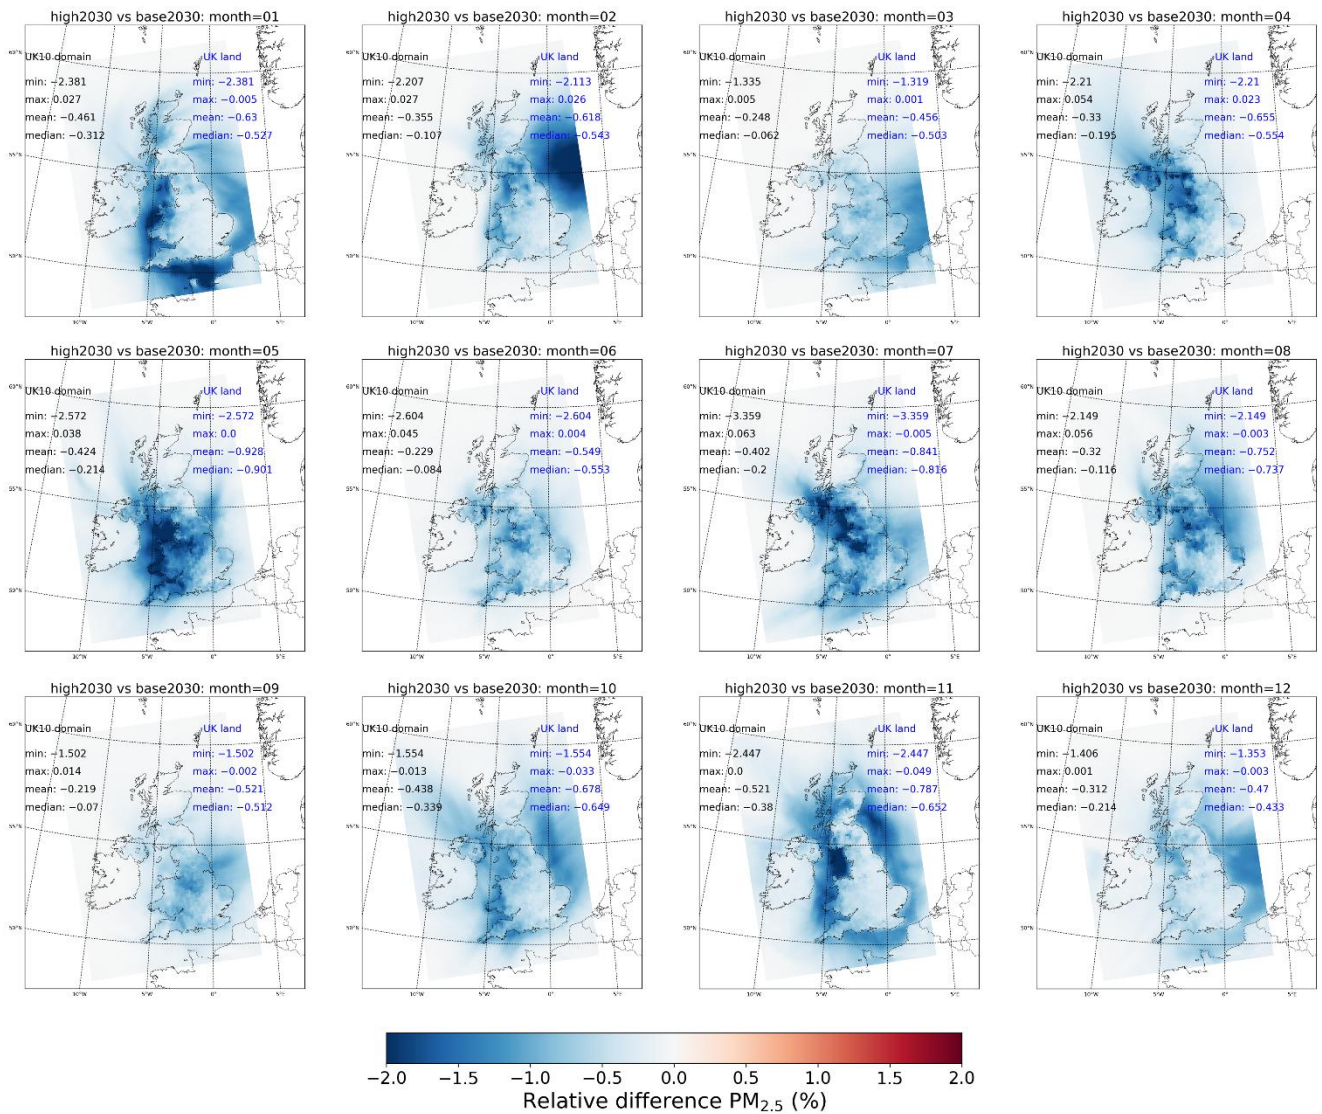

**Figure S5. Relative difference of the PM<sub>2.5</sub> concentration with high2030 scenario compared to base2030 for each month. The minimum, maximum, mean, and median relative difference values in the whole UK10 domain (in black) and for the UK land grid cells (blue) are provided. The relative difference is calculated as follow:  $((\text{high2030}-\text{base2030})/\text{base2030}) \times 100\%$ .**

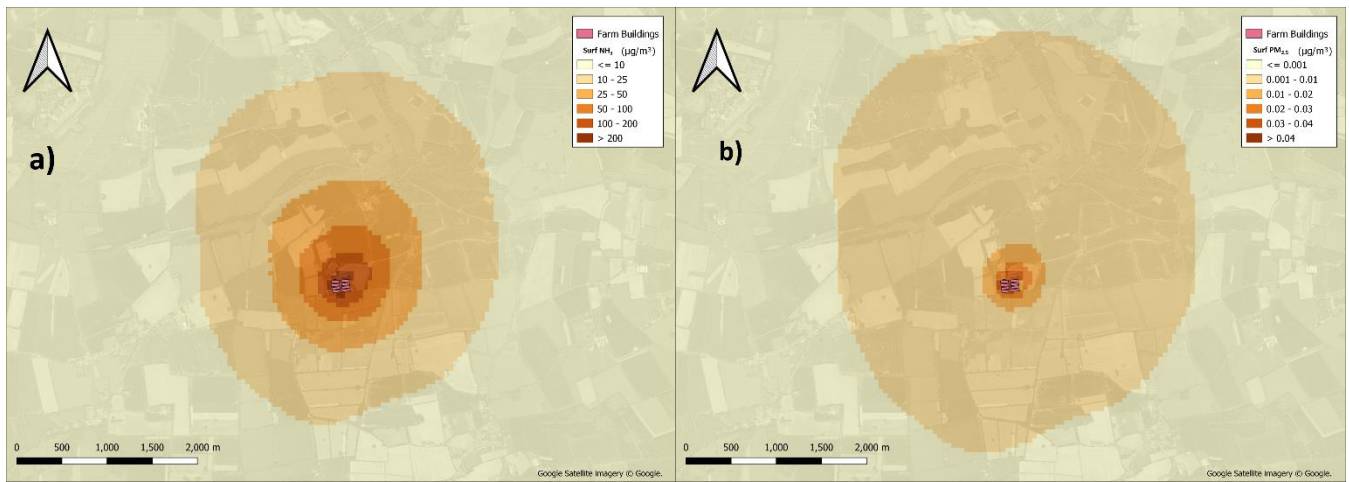

Figure S6. Distribution of  $\text{NH}_3$  (a) and  $\text{PM}_{2.5}$  (b) surface concentrations in  $\mu\text{g}/\text{m}^3$  at farm three for the base2030 scenario.

**Table S1. Name, coordinates, annual mean PM<sub>2.5</sub> measured, and annual mean PM<sub>2.5</sub> modelled concentrations in µg/m<sup>3</sup> in 2019. The concentrations of the corresponding PM<sub>2.5</sub> components in µg/m<sup>3</sup> calculated by CMAQ are also provided.**

| site                         | Latitude (°) | Longitude (°) | PM <sub>2.5</sub> Obs | PM <sub>2.5</sub> CMAQ | NO <sub>3</sub> | SO <sub>4</sub> | NH <sub>4</sub> | EC   | Cl   | Na   | OC   | soil | unspeciated |
|------------------------------|--------------|---------------|-----------------------|------------------------|-----------------|-----------------|-----------------|------|------|------|------|------|-------------|
| Aberdeen                     | 57.15736     | -2.094278     | 7.19                  | 2.45                   | 0.32            | 0.64            | 0.23            | 0.28 | 0.09 | 0.1  | 0.19 | 0.18 | 0.41        |
| Auchencorth Moss             | 55.79216     | -3.2429       | 4.38                  | 2.52                   | 0.56            | 0.62            | 0.31            | 0.16 | 0.09 | 0.09 | 0.18 | 0.19 | 0.31        |
| Barnstaple A39               | 51.074793    | -4.041924     | 10.61                 | 3.5                    | 0.6             | 0.99            | 0.43            | 0.32 | 0.13 | 0.13 | 0.22 | 0.22 | 0.48        |
| Belfast Centre               | 54.59965     | -5.928833     | 8.61                  | 5.09                   | 1.16            | 1.15            | 0.66            | 0.53 | 0.09 | 0.1  | 0.4  | 0.22 | 0.79        |
| Birmingham A4540 Roadside    | 52.476145    | -1.874978     | 10.11                 | 5.16                   | 1.16            | 1.15            | 0.67            | 0.56 | 0.08 | 0.1  | 0.41 | 0.21 | 0.82        |
| Birmingham Acocks Green      | 52.437165    | -1.829999     | 9.16                  | 5.28                   | 0.9             | 1.33            | 0.63            | 0.68 | 0.15 | 0.13 | 0.41 | 0.22 | 0.83        |
| Birmingham Ladywood          | 52.481346    | -1.918235     | 10.79                 | 4                      | 0.96            | 0.92            | 0.5             | 0.26 | 0.12 | 0.13 | 0.36 | 0.23 | 0.53        |
| Blackpool Marton             | 53.80489     | -3.007175     | 10.76                 | 4.09                   | 1.01            | 0.94            | 0.54            | 0.29 | 0.11 | 0.11 | 0.33 | 0.22 | 0.53        |
| Bristol St Paul's            | 51.462839    | -2.584482     | 8.36                  | 4.52                   | 1.16            | 1.05            | 0.64            | 0.36 | 0.1  | 0.1  | 0.32 | 0.2  | 0.58        |
| Camden Kerbside              | 51.54421     | -0.175269     | 8                     | 4.43                   | 1.14            | 0.99            | 0.6             | 0.32 | 0.1  | 0.1  | 0.39 | 0.21 | 0.59        |
| Cardiff Centre               | 51.48178     | -3.17625      | 9.05                  | 5.19                   | 1.25            | 1.13            | 0.69            | 0.52 | 0.09 | 0.1  | 0.41 | 0.21 | 0.79        |
| Carlisle Roadside            | 54.894834    | -2.945307     | 9.41                  | 2.22                   | 0.29            | 0.65            | 0.23            | 0.17 | 0.11 | 0.11 | 0.17 | 0.19 | 0.31        |
| Chatham Roadside             | 51.374264    | 0.54797       | 10.44                 | 4.5                    | 1.28            | 0.95            | 0.58            | 0.17 | 0.21 | 0.16 | 0.39 | 0.24 | 0.53        |
| Chepstow A48                 | 51.638094    | -2.678731     | 6.32                  | 3.6                    | 0.62            | 0.86            | 0.39            | 0.45 | 0.09 | 0.1  | 0.24 | 0.22 | 0.63        |
| Chesterfield Loundsley Green | 53.244131    | -1.454946     | 6.69                  | 3.64                   | 0.58            | 0.88            | 0.39            | 0.47 | 0.1  | 0.1  | 0.25 | 0.2  | 0.66        |
| Chesterfield Roadside        | 53.231751    | -1.456928     | 10.76                 | 4.72                   | 1.32            | 1.04            | 0.68            | 0.34 | 0.1  | 0.1  | 0.35 | 0.21 | 0.59        |
| Chilbolton Observatory       | 51.149617    | -1.438228     | 9.82                  | 4.58                   | 1.18            | 0.99            | 0.62            | 0.38 | 0.09 | 0.09 | 0.38 | 0.21 | 0.64        |
| Christchurch Barrack Road    | 50.735454    | -1.780888     | 12.35                 | 4.87                   | 1.05            | 1.17            | 0.64            | 0.49 | 0.1  | 0.1  | 0.35 | 0.22 | 0.75        |
| Coventry Allesley            | 52.411628    | -1.560189     | 11.12                 | 4.75                   | 1.31            | 1.02            | 0.67            | 0.37 | 0.09 | 0.09 | 0.36 | 0.2  | 0.61        |
| Derry Rosemount              | 55.002818    | -7.331179     | 11.62                 | 6.14                   | 1.51            | 1.28            | 0.81            | 0.67 | 0.09 | 0.11 | 0.45 | 0.23 | 0.98        |
| Eastbourne                   | 50.805778    | 0.271611      | 10.63                 | 6.32                   | 1.38            | 1.33            | 0.79            | 0.75 | 0.08 | 0.11 | 0.51 | 0.23 | 1.14        |
| Edinburgh St Leonards        | 55.945589    | -3.182186     | 10.8                  | 6.62                   | 1.49            | 1.39            | 0.84            | 0.77 | 0.09 | 0.11 | 0.52 | 0.23 | 1.18        |
| Glasgow High                 | 55.860936    | -4.238214     | 9.89                  | 6.98                   | 1.39            | 1.48            | 0.84            | 0.9  | 0.08 | 0.11 | 0.56 | 0.23 | 1.38        |

|                                    |           |           |       |      |      |      |      |      |      |      |      |      |      |
|------------------------------------|-----------|-----------|-------|------|------|------|------|------|------|------|------|------|------|
| Street                             |           |           |       |      |      |      |      |      |      |      |      |      |      |
| Glasgow<br>Townhead                | 55.865782 | -4.243631 | 9.54  | 6.85 | 1.43 | 1.45 | 0.85 | 0.87 | 0.08 | 0.1  | 0.54 | 0.22 | 1.29 |
| Grangemouth                        | 56.010319 | -3.704399 | 11.88 | 6.11 | 1.34 | 1.28 | 0.76 | 0.72 | 0.08 | 0.1  | 0.53 | 0.23 | 1.06 |
| Greenock A8<br>Roadside            | 55.944079 | -4.734421 | 12.4  | 6.98 | 1.48 | 1.46 | 0.86 | 0.9  | 0.09 | 0.11 | 0.53 | 0.23 | 1.32 |
| Hull Freetown                      | 53.74878  | -0.341222 | 4.97  | 1.7  | 0.27 | 0.48 | 0.14 | 0.05 | 0.12 | 0.12 | 0.13 | 0.19 | 0.21 |
| Inverness                          | 57.481308 | -4.241451 | 11.44 | 5.76 | 1.08 | 1.42 | 0.74 | 0.7  | 0.1  | 0.11 | 0.42 | 0.22 | 0.98 |
| Leamington Spa                     | 52.28881  | -1.533119 | 10.22 | 4.02 | 0.95 | 0.92 | 0.53 | 0.34 | 0.1  | 0.1  | 0.31 | 0.21 | 0.56 |
| Leeds Centre                       | 53.80378  | -1.546472 | 8.87  | 4.16 | 0.79 | 1.01 | 0.51 | 0.47 | 0.09 | 0.1  | 0.32 | 0.2  | 0.67 |
| Leeds<br>Headingley<br>Kerbside    | 53.819972 | -1.576361 | 9.48  | 4.95 | 0.98 | 1.22 | 0.63 | 0.5  | 0.11 | 0.11 | 0.42 | 0.22 | 0.75 |
| Leicester<br>University            | 52.619904 | -1.127182 | 11.51 | 4.43 | 1.27 | 0.95 | 0.63 | 0.3  | 0.09 | 0.09 | 0.36 | 0.2  | 0.54 |
| Liverpool Speke                    | 53.34633  | -2.844333 | 10.35 | 5.03 | 1.62 | 0.99 | 0.76 | 0.3  | 0.11 | 0.1  | 0.38 | 0.21 | 0.57 |
| London Bexley                      | 51.46603  | 0.184806  | 10.83 | 5.58 | 1.29 | 1.26 | 0.75 | 0.61 | 0.09 | 0.1  | 0.41 | 0.21 | 0.87 |
| London<br>Bloomsbury               | 51.52229  | -0.125889 | 8.88  | 4.54 | 1.18 | 0.98 | 0.61 | 0.37 | 0.09 | 0.09 | 0.4  | 0.21 | 0.61 |
| London Eltham                      | 51.45258  | 0.070766  | 11.19 | 3.09 | 0.56 | 0.78 | 0.32 | 0.18 | 0.16 | 0.15 | 0.27 | 0.23 | 0.45 |
| London<br>Harlington               | 51.48879  | -0.441614 | 8.96  | 5.24 | 1.15 | 1.23 | 0.66 | 0.47 | 0.12 | 0.13 | 0.45 | 0.23 | 0.79 |
| London Honor<br>Oak Park           | 51.449674 | -0.037418 | 9.4   | 4.94 | 1.01 | 1.2  | 0.64 | 0.54 | 0.11 | 0.11 | 0.36 | 0.21 | 0.75 |
| London N.<br>Kensington            | 51.52105  | -0.213492 | 10.76 | 5.55 | 1.35 | 1.19 | 0.72 | 0.54 | 0.09 | 0.11 | 0.49 | 0.23 | 0.83 |
| London<br>Teddington<br>Bushy Park | 51.425286 | -0.345606 | 9.45  | 5.84 | 1.06 | 1.42 | 0.73 | 0.75 | 0.1  | 0.11 | 0.43 | 0.22 | 1.02 |
| London<br>Westminster              | 51.49467  | -0.131931 | 10.42 | 4.54 | 1.03 | 1.08 | 0.61 | 0.42 | 0.09 | 0.1  | 0.33 | 0.22 | 0.65 |
| Lough Navar                        | 54.43951  | -7.900328 | 9.6   | 5.32 | 1.13 | 1.23 | 0.67 | 0.56 | 0.1  | 0.11 | 0.46 | 0.21 | 0.84 |
| Manchester<br>Piccadilly           | 53.48152  | -2.237881 | 10.69 | 5.44 | 1.36 | 1.17 | 0.72 | 0.5  | 0.08 | 0.11 | 0.48 | 0.23 | 0.79 |
| Middlesbrough                      | 54.569297 | -1.220874 | 9.48  | 4.32 | 1.18 | 0.98 | 0.63 | 0.3  | 0.1  | 0.09 | 0.32 | 0.2  | 0.53 |
| Narberth                           | 51.782616 | -4.69237  | 9.41  | 4.22 | 0.82 | 1.02 | 0.5  | 0.46 | 0.1  | 0.11 | 0.31 | 0.22 | 0.68 |
| Newport                            | 51.601203 | -2.977281 | 9.48  | 4.51 | 1.01 | 1.12 | 0.61 | 0.39 | 0.11 | 0.11 | 0.34 | 0.21 | 0.62 |
| Northampton<br>Spring Park         | 52.272257 | -0.916605 | 8.03  | 4.51 | 0.87 | 1.22 | 0.59 | 0.39 | 0.11 | 0.12 | 0.34 | 0.23 | 0.65 |
| Norwich<br>Lakenfields             | 52.614823 | 1.302686  | 11.07 | 4.83 | 1.22 | 1.08 | 0.67 | 0.43 | 0.1  | 0.1  | 0.36 | 0.21 | 0.67 |

|          |   |   |      |      |      |      |      |      |      |      |      |      |      |
|----------|---|---|------|------|------|------|------|------|------|------|------|------|------|
| All mean | - | - | 9.69 | 4.74 | 1.06 | 1.09 | 0.61 | 0.46 | 0.10 | 0.11 | 0.37 | 0.22 | 0.72 |
|----------|---|---|------|------|------|------|------|------|------|------|------|------|------|
